# Supplementary material
Source: PubMed Central journal article supplement (PMC5478992)
Supplement: AEM.00472-17_zam999117920s1.pdf [file AEM.00472-17_zam999117920s1.pdf]

**TABLE S1** Meteorological information.

| <b>Assay</b> | <b>Sampling date</b> | <b>Temperature*<br/>(Max. - Min.)<br/>[°C]</b> | <b>Relative humidity*<br/>(Max. - Min.)<br/>[%]</b> | <b>Barometric pressure*<br/>(Max. - Min.)<br/>[hPa]</b> | <b>Wind speed<sup>a</sup><br/>(Max. wind gust)<br/>[m/s]</b> | <b>Wind<br/>direction<sup>b</sup></b> | <b>Precipitation<sup>c</sup><br/>[mm]</b> | <b>Total insolation [h]<br/>(% insolation)</b> |
|--------------|----------------------|------------------------------------------------|-----------------------------------------------------|---------------------------------------------------------|--------------------------------------------------------------|---------------------------------------|-------------------------------------------|------------------------------------------------|
| A            | 2-9/Dec 2015         | 16.6 – 3.7                                     | 90 – 46                                             | 957.0 – 949.4                                           | 0.75 (4.70)                                                  | N                                     | 0.0                                       | 6.0 (64%)                                      |
| B            | 9-16/Dec 2015        | 15.5 – 5.1                                     | 88 - 61                                             | 958.2 – 943.2                                           | 0.90 (8.30)                                                  | N                                     | 0.2                                       | 3.6 (38%)                                      |
| C            | 16-23/Dec 2015       | 15.4 – 4.5                                     | 96 – 49                                             | 956.0 – 944.6                                           | 0.64 (8.61)                                                  | N                                     | 0.0                                       | 6.5 (70%)                                      |
| M            | 20-27/Jul 2015       | 37.6 – 20.0                                    | 92 – 29                                             | 941.5 – 934.6                                           | 1.83 (8.80)                                                  | W                                     | 3.6                                       | 12.8 (88%)                                     |

\* Maximum and minimum values measured during the sampling time

<sup>a</sup> Average of the sampling time

<sup>b</sup> Predominant during sampling time

<sup>c</sup> Total registered

**TABLE S2** Statistical comparison between NGS and morphological assignation for pollen. Concordance Correlation Coefficient (CCC) was determined to analyze the agreement between both methods. The results of relative abundance from NGS analyses were corrected to match 100% to compare only those pollen types that were identified by microscopy.

| Sample A1       |             |         |                   | Sample B1       |             |         |                   | Sample C1       |             |         |                   |
|-----------------|-------------|---------|-------------------|-----------------|-------------|---------|-------------------|-----------------|-------------|---------|-------------------|
| Pollen type     | Morpho. (%) | NGS (%) | NGS (% corrected) | Pollen type     | Morpho. (%) | NGS (%) | NGS (% corrected) | Pollen type     | Morpho. (%) | NGS (%) | NGS (% corrected) |
| Artemisia       | 0.33        | 0.06    | 0.09              | Artemisia       | 0.67        | 0.20    | 0.30              | Artemisia       | 0.36        | 0.40    | 0.54              |
| Compositae      | 0.66        | 0.24    | 0.37              | Compositae      | 0.34        | 0.10    | 0.15              | Compositae      | 0.18        | 0.10    | 0.14              |
| Fabaceae        | 0.66        | 2.00    | 3.10              | Cheno./Amar.    | 1.35        | 0.01    | 0.03              | Cheno./Amar.    | 0.54        | 0.00    | 0.00              |
| Quercus         | 0.99        | 0.30    | 0.46              | Fabaceae        | 0.67        | 1.00    | 1.53              | Fabaceae        | 0.54        | 1.00    | 1.36              |
| Fraxinus        | 0.66        | 0.50    | 0.77              | Quercus         | 2.69        | 0.40    | 0.61              | Alnus           | 0.18        | 0.04    | 0.05              |
| Eucalyptus      | 0.33        | 0.00    | 0.00              | Fraxinus        | 1.01        | 0.10    | 0.15              | Quercus         | 2.14        | 2.00    | 2.72              |
| Cupress./Taxac. | 89.77       | 37.00   | 57.00             | Olea            | 1.01        | 0.00    | 0.00              | Fraxinus        | 1.61        | 1.00    | 1.36              |
| Pinaceae        | 0.33        | 0.00    | 0.00              | Populus         | 0.34        | 2.00    | 3.06              | Cupress./Taxac. | 89.46       | 60.00   | 81.82             |
| Poaceae         | 1.65        | 6.00    | 9.23              | Cupress./Taxac. | 81.82       | 52.00   | 79.70             | Pinaceae        | 0.71        | 0.00    | 0.00              |
| Platanus        | 0.66        | 1.00    | 1.54              | Pinaceae        | 1.35        | 0.00    | 0.00              | Poaceae         | 1.07        | 3.00    | 4.10              |
| Urticaceae      | 2.31        | 16.00   | 24.61             | Poaceae         | 3.03        | 5.00    | 7.66              | Urticaceae      | 2.86        | 5.00    | 6.82              |
| Unidentified    | 1.65        | 1.91    | 2.94              | Urticaceae      | 4.38        | 4.00    | 6.13              | Unidentified    | 0.36        | 0.79    | 1.10              |
| Total           | 100.00      | 65.01   | 100.00            | Unidentified    | 1.35        | 0.44    | 0.67              | Total           | 100.00      | 73.33   | 100.00            |
|                 |             |         |                   | Total           | 100.00      | 65.25   | 100.00            |                 |             |         |                   |
|                 | CCC         |         | 0.84              |                 |             |         |                   |                 | CCC         |         | 0.99              |
|                 |             |         |                   | CCC             |             |         | 0.96              |                 |             |         |                   |

**TABLE S3** Statistical comparison between NGS and morphological assignation for fungal spores. Concordance Correlation Coefficient (CCC) was determined to analyze the agreement between both methods. The group “Others” was removed to reduce the uncertainty and the relative abundance were corrected to match 100% in both methods.

| Sample A1                                                   |             |                       |         |                   | Sample B1                                                   |             |                       |         |                   | Sample C1                                                   |             |                       |         |                   |
|-------------------------------------------------------------|-------------|-----------------------|---------|-------------------|-------------------------------------------------------------|-------------|-----------------------|---------|-------------------|-------------------------------------------------------------|-------------|-----------------------|---------|-------------------|
| Morphological type                                          | Morpho. (%) | Morpho. (% corrected) | NGS (%) | NGS (% corrected) | Morphological type                                          | Morpho. (%) | Morpho. (% corrected) | NGS (%) | NGS (% corrected) | Morphological type                                          | Morpho. (%) | Morpho. (% corrected) | NGS (%) | NGS (% corrected) |
| Davidiella = Cladosporium (C. herbarum + C. cladosporoides) | 26.83       | 76.48                 | 35.00   | 64.87             | Davidiella = Cladosporium (C. herbarum + C. cladosporoides) | 46.02       | 88.19                 | 35.00   | 67.92             | Davidiella = Cladosporium (C. herbarum + C. cladosporoides) | 55.13       | 89.39                 | 45.00   | 77.80             |
| Polythrincium (= Mycosphaerella)                            | 0.08        | 0.23                  | 0.02    | 0.04              | Polythrincium (= Mycosphaerella)                            | 0.06        | 0.11                  | 0.00    | 0.00              | Polythrincium (= Mycosphaerella)                            | 0.11        | 0.17                  | 0.00    | 0.00              |
| Epicoccum                                                   | 0.46        | 1.31                  | 2.00    | 3.71              | Epicoccum                                                   | 0.11        | 0.21                  | 5.00    | 9.70              | Epicoccum                                                   | 0.29        | 0.47                  | 2.00    | 3.46              |
| Alternaria                                                  | 1.31        | 3.73                  | 12.00   | 22.24             | Alternaria                                                  | 0.56        | 1.07                  | 8.00    | 15.52             | Alternaria                                                  | 0.42        | 0.67                  | 7.00    | 12.10             |
| Drechslera                                                  | 0.69        | 1.97                  | 0.50    | 0.93              | Drechslera                                                  | 0.17        | 0.32                  | 0.00    | 0.00              | Drechslera                                                  | 0.35        | 0.57                  | 0.00    | 0.00              |
| Chaetomium                                                  | 0.69        | 1.97                  | 1.00    | 1.85              | Spegazzinia                                                 | 0.45        | 0.86                  | 0.06    | 0.12              | Curvularia                                                  | 0.03        | 0.05                  | 0.01    | 0.01              |
| Xylariales                                                  | 0.46        | 1.31                  | 0.20    | 0.37              | Chaetomium                                                  | 0.34        | 0.64                  | 0.70    | 1.36              | Tetraploa                                                   | 0.03        | 0.05                  | 0.00    | 0.00              |
| Arthrinium                                                  | 0.69        | 1.97                  | 0.10    | 0.19              | Fusarium                                                    | 0.56        | 1.07                  | 0.30    | 0.58              | Spegazzinia                                                 | 0.09        | 0.15                  | 0.01    | 0.02              |
| Khuskia                                                     | 0.69        | 1.97                  | 0.01    | 0.02              | Xylariales                                                  | 0.28        | 0.54                  | 0.20    | 0.39              | Chaetomium                                                  | 0.29        | 0.47                  | 0.70    | 1.21              |
| Psathyrellaceae                                             | 1.16        | 3.31                  | 0.50    | 0.93              | Arthrinium                                                  | 0.34        | 0.64                  | 0.01    | 0.02              | Xylariales                                                  | 0.03        | 0.05                  | 0.20    | 0.35              |
| Bovista                                                     | 0.54        | 1.54                  | 0.80    | 1.48              | Khuskia                                                     | 0.73        | 1.40                  | 0.03    | 0.06              | Arthrinium                                                  | 0.62        | 1.00                  | 0.06    | 0.10              |
| Ganoderma                                                   | 0.15        | 0.43                  | 0.03    | 0.06              | Beltrania                                                   | 0.00        | 0.00                  | 0.00    | 0.00              | Khuskia                                                     | 0.38        | 0.62                  | 0.01    | 0.01              |
| Boletales                                                   | 0.23        | 0.66                  | 0.30    | 0.56              | Psathyrellaceae                                             | 1.06        | 2.04                  | 0.50    | 0.97              | Beltrania                                                   | 0.03        | 0.05                  | 0.01    | 0.02              |
| Thelephoraceae                                              | 0.39        | 1.11                  | 0.09    | 0.17              | Bovista                                                     | 0.17        | 0.32                  | 0.50    | 0.97              | Psathyrellaceae                                             | 0.86        | 1.40                  | 0.90    | 1.56              |
| Pucciniomycetes                                             | 0.15        | 0.43                  | 0.40    | 0.74              | Ganoderma                                                   | 0.28        | 0.54                  | 0.06    | 0.12              | Bovista                                                     | 1.02        | 1.65                  | 0.60    | 1.04              |
| Ustilaginomycetes                                           | 0.54        | 1.54                  | 1.00    | 1.85              | Thelephoraceae                                              | 0.17        | 0.32                  | 0.07    | 0.14              | Ganoderma                                                   | 0.32        | 0.52                  | 0.05    | 0.09              |
| Total                                                       | 35.08       | 100.00                | 53.95   | 100.00            | Pucciniomycetes                                             | 0.17        | 0.32                  | 0.80    | 1.55              | Boletales                                                   | 0.09        | 0.15                  | 0.30    | 0.52              |
|                                                             | CCC         |                       |         | 0.94              | Ustilaginomycetes                                           | 0.73        | 1.40                  | 0.30    | 0.58              | Thelephoraceae                                              | 0.34        | 0.55                  | 0.20    | 0.35              |
|                                                             |             |                       |         |                   | Total                                                       | 52.19       | 100.00                | 51.53   | 100.00            | Pucciniomycetes                                             | 0.11        | 0.17                  | 0.30    | 0.52              |
|                                                             |             |                       |         |                   |                                                             | CCC         |                       |         | 0.94              | Ustilaginomycetes                                           | 1.12        | 1.82                  | 0.50    | 0.86              |
|                                                             |             |                       |         |                   |                                                             |             |                       |         |                   | Total                                                       | 61.67       | 100.00                | 57.84   | 100.00            |
|                                                             |             |                       |         |                   |                                                             |             |                       |         |                   |                                                             | CCC         |                       |         | 0.98              |

**TABLE S4** Complete morphological classification of fungal propagules.

| Phylum              | Class           | Order                          | Family             | Genus                                  | Morphological spore type / hypha | Sample A1                           |                                | Sample B1 |       | Sample C1 |       |      |      |      |
|---------------------|-----------------|--------------------------------|--------------------|----------------------------------------|----------------------------------|-------------------------------------|--------------------------------|-----------|-------|-----------|-------|------|------|------|
|                     |                 |                                |                    |                                        |                                  | Total                               | %                              | Total     | %     | Total     | %     |      |      |      |
| Ascomycota          | Dothideomycetes | Capnodiales                    | Davidiellaceae     | <i>Davidiella</i> =                    | C. herbarum                      | 390                                 | 15.03                          | 957       | 17.87 | 1297      | 19.97 |      |      |      |
|                     |                 |                                | Mycosphaerellaceae | <i>Cladosporium</i>                    | C. cladosporioides               | 306                                 | 11.8                           | 1507      | 28.15 | 2284      | 35.16 |      |      |      |
|                     |                 |                                |                    | <i>Cercospora</i>                      | Cercospora                       | 0                                   | 0                              | 12        | 0.22  | 0         | 0     |      |      |      |
|                     |                 |                                |                    | <i>Passalora</i>                       | Passalora                        | 0                                   | 0                              | 0         | 0     | 0         | 0     |      |      |      |
|                     |                 |                                | Pleosporales       | Pleosporaceae                          | <i>Polythrincium</i>             | Polythrincium                       | 2                              | 0.08      | 3     | 0.06      | 7     | 0.11 |      |      |
|                     |                 |                                |                    |                                        | <i>Epicoccum</i>                 | Epicoccum nigrum                    | 12                             | 0.46      | 6     | 0.11      | 19    | 0.29 |      |      |
|                     |                 |                                |                    |                                        | <i>Alternaria</i>                | Alternaria                          | 34                             | 1.31      | 30    | 0.56      | 27    | 0.42 |      |      |
|                     |                 |                                |                    | <i>Drechslera</i> = <i>Pyrenophora</i> | Drechslera                       | 18                                  | 0.69                           | 9         | 0.17  | 23        | 0.35  |      |      |      |
|                     |                 |                                |                    | <i>Curvularia</i>                      | Curvularia                       | 0                                   | 0                              | 0         | 0     | 2         | 0.03  |      |      |      |
|                     |                 |                                |                    | <i>Stemphylium</i>                     | Stemphylium                      | 18                                  | 0.69                           | 12        | 0.22  | 10        | 0.15  |      |      |      |
|                     |                 | <i>Pleospora</i>               |                    | Pleospora                              | 4                                | 0.15                                | 24                             | 0.45      | 19    | 0.29      |       |      |      |      |
|                     |                 | <i>Pithomyces</i>              |                    | Pithomyces                             | 28                               | 1.08                                | 18                             | 0.34      | 14    | 0.22      |       |      |      |      |
|                     |                 | Leptosphaeriaceae              |                    | Leptosphaeria                          | 10                               | 0.39                                | 60                             | 1.12      | 26    | 0.4       |       |      |      |      |
|                     |                 | Sporormiaceae                  |                    | Sporormiella                           | 0                                | 0                                   | 0                              | 0         | 0     | 0         |       |      |      |      |
|                     |                 | Tetraplospora                  | Tetraploa          | 0                                      | 0                                | 0                                   | 0                              | 2         | 0.03  |           |       |      |      |      |
|                     |                 | Eurotiomycetes                 | Eurotiales         | Trichocomaceae                         | <i>Aspergillus</i>               | Aspergillaceae                      | 22                             | 0.85      | 105   | 1.96      | 463   | 7.13 |      |      |
|                     |                 |                                |                    |                                        | <i>Penicillium</i>               | 0                                   | 0                              | 0         | 0     | 0         | 0     |      |      |      |
|                     |                 |                                |                    | incertae sedis                         | <i>Periconia</i>                 | Periconia                           | 4                              | 0.15      | 3     | 0.06      | 5     | 0.08 |      |      |
|                     |                 |                                |                    |                                        | Dothideales                      | Dothioraceae                        | <i>Aureobasidium pullulans</i> | Torula    | 20    | 0.77      | 9     | 0.17 | 19   | 0.29 |
|                     |                 |                                |                    |                                        | Microthyriales                   | Microthyriaceae                     | 0                              | 0         | 24    | 0.45      | 6     | 0.09 |      |      |
|                     |                 | incertae sedis                 | Monodictys         | 4                                      | 0.15                             | 15                                  | 0.28                           | 11        | 0.17  |           |       |      |      |      |
|                     |                 | Leotiomycetes                  | Erysiphales        | Erysiphaceae                           | <i>Blumeria</i>                  | Oidium                              | 0                              | 0         | 33    | 0.62      | 8     | 0.12 |      |      |
|                     |                 |                                |                    | Helotiales                             | Sclerotiniaceae                  | <i>Botrytis</i> = <i>Botryotina</i> | Botrytis                       | 56        | 2.16  | 24        | 0.45  | 64   | 0.99 |      |
|                     |                 |                                | Sordariomycetes    | Sordariales                            | Chaetomiaceae                    | <i>Chaetonium</i>                   | Chaetonium                     | 18        | 0.69  | 18        | 0.34  | 19   | 0.29 |      |
|                     |                 |                                |                    | Hypocreales                            | Nectriaceae                      | <i>Fusarium</i>                     | Fusarium                       | 0         | 0     | 30        | 0.56  | 0    | 0    |      |
|                     |                 |                                |                    | Xylariales                             | Xylariaceae                      | <i>Xylaria</i>                      | Xylaria                        | 12        | 0.46  | 15        | 0.28  | 2    | 0.03 |      |
|                     |                 |                                |                    |                                        | Diatrypales                      | Diatrypaceae                        | 0                              | 0         | 0     | 0         | 0     | 0    |      |      |
| incertae sedis      | Arthrinium      |                                |                    | Arthrinium                             | 18                               | 0.69                                | 18                             | 0.34      | 40    | 0.62      |       |      |      |      |
|                     | <i>Khuskia</i>  |                                |                    | Nigrospora                             | 18                               | 0.69                                | 39                             | 0.73      | 25    | 0.38      |       |      |      |      |
| Pezizomycetes       | Pezizales       |                                | Ascobolaceae       | <i>Ascobolus</i>                       | Ascobolus                        | 0                                   | 0                              | 0         | 0     | 0         |       |      |      |      |
| incertae sedis      | Beltrania       |                                | 0                  | 0                                      | 0                                | 0                                   | 2                              | 0.03      |       |           |       |      |      |      |
| Basidiomycota       | Agaricomycetes  | Agaricales                     | Psathyrellaceae    | Basidiospores                          | 266                              | 10.25                               | 279                            | 5.21      | 269   | 4.14      |       |      |      |      |
|                     |                 |                                | Agaricaceae        | <i>Bovista</i>                         | Coprinus                         | 30                                  | 1.16                           | 57        | 1.06  | 56        | 0.86  |      |      |      |
|                     |                 | Strophariaceae                 | <i>Bovista</i>     | Bovista                                | 14                               | 0.54                                | 9                              | 0.17      | 66    | 1.02      |       |      |      |      |
|                     |                 |                                | <i>Agrocybe</i>    | Agrocybe                               | 6                                | 0.23                                | 15                             | 0.28      | 4     | 0.06      |       |      |      |      |
|                     |                 | Ganodermatale: Ganodermataceae | <i>Ganoderma</i>   | Ganoderma                              | 4                                | 0.15                                | 15                             | 0.28      | 21    | 0.32      |       |      |      |      |
|                     |                 | Boletales                      | Boletaceae         | <i>Boletus</i>                         | Boletus                          | 6                                   | 0.23                           | 0         | 0     | 6         | 0.09  |      |      |      |
|                     |                 | Thelephorales                  | Thelephoraceae     | <i>Thelephora</i>                      | Thelephora                       | 10                                  | 0.39                           | 9         | 0.17  | 22        | 0.34  |      |      |      |
|                     |                 | Pucciniales                    | Puccinia           | 4                                      | 0.15                             | 9                                   | 0.17                           | 7         | 0.11  |           |       |      |      |      |
|                     |                 | Ustilaginomycetes              | Ustilaginales      | <i>Ustilago</i>                        | Ustilago                         | 14                                  | 0.54                           | 39        | 0.73  | 73        | 1.12  |      |      |      |
|                     |                 | Exobasidiomycetes              | Tilletiales        | Tilletiaceae                           | <i>Tilletia</i>                  | Tilletia                            | 0                              | 0         | 0     | 0         | 2     | 0.03 |      |      |
| Myxomycota          | Unidentified    |                                |                    |                                        | Myxomycetes                      | 320                                 | 12.34                          | 287       | 5.36  | 314       | 4.83  |      |      |      |
|                     |                 |                                |                    |                                        | simple-hyaline                   | 142                                 | 5.47                           | 408       | 7.62  | 92        | 1.42  |      |      |      |
|                     |                 |                                |                    |                                        | uniseptate-hyaline               | 20                                  | 0.77                           | 184       | 3.44  | 12        | 0.18  |      |      |      |
|                     |                 |                                |                    |                                        | fragmo-hyaline                   | 0                                   | 0                              | 15        | 0.28  | 4         | 0.06  |      |      |      |
|                     |                 |                                |                    |                                        | filiform-hyaline                 | 0                                   | 0                              | 0         | 0     | 0         | 0     |      |      |      |
|                     |                 |                                |                    |                                        | helico-hyaline                   | 0                                   | 0                              | 15        | 0.28  | 5         | 0.08  |      |      |      |
|                     |                 |                                |                    |                                        | simple-brown                     | 224                                 | 8.64                           | 573       | 10.7  | 544       | 8.37  |      |      |      |
|                     |                 |                                |                    |                                        | uniseptate-brown                 | 120                                 | 4.63                           | 140       | 2.61  | 131       | 2.02  |      |      |      |
|                     |                 |                                |                    |                                        | fragmo-brown                     | 60                                  | 2.31                           | 69        | 1.29  | 52        | 0.8   |      |      |      |
|                     |                 |                                |                    |                                        | muriform-brown                   | 30                                  | 1.16                           | 21        | 0.39  | 20        | 0.31  |      |      |      |
|                     |                 |                                |                    |                                        | hyphae hyaline                   | 4                                   | 0.15                           | 12        | 0.22  | 0         | 0     |      |      |      |
|                     |                 |                                |                    |                                        | hyphae brown                     | 326                                 | 12.57                          | 200       | 3.74  | 385       | 5.93  |      |      |      |
|                     |                 |                                |                    |                                        | <b>TOTAL</b>                     |                                     |                                |           |       | 2594      | 100   | 5354 | 100  | 6496 |
| <b>OTHERS TOTAL</b> |                 |                                |                    |                                        | 1684                             |                                     | 2560                           |           | 2490  |           |       |      |      |      |

**FIG S1**

**A**

| Amplicon ITSD                                                       | Assay A         |                 | Assay B        |                | Assay C         |                 | M0               |
|---------------------------------------------------------------------|-----------------|-----------------|----------------|----------------|-----------------|-----------------|------------------|
|                                                                     | A1              | A2              | B1             | B2             | C1              | C2              | M0               |
| No. reads (2x300)                                                   | 144655          | 195875          | 157699         | 187428         | 180709          | 174039          | 200333           |
| No. sequences after pairing and quality filtering                   | 117666          | 157030          | 130384         | 156554         | 149210          | 143120          | 160245           |
| No. sequences after minimal OTUs filtering ( $n \geq 5$ )           | 112196          | 149903          | 123867         | 149414         | 142114          | 136830          | 146744           |
| No. sequences unassigned (final data for grouped analyses)          | 2313<br>(2.06%) | 2858<br>(1.91%) | 549<br>(0.44%) | 888<br>(0.59%) | 1117<br>(0.79%) | 1027<br>(0.75%) | 11672<br>(7.95%) |
| No. of OTUs (final data for grouped analyses)                       | 201             | 133             | 166            | 176            | 188             | 166             | 187              |
| No. of OTUs after filtering each pair for statistics ( $n \geq 5$ ) | 182             | 114             | 136            | 130            | 140             | 133             | 161              |
| No. sequences for rarefaction (PCoA and statistics)                 |                 |                 |                | 110000         |                 |                 |                  |

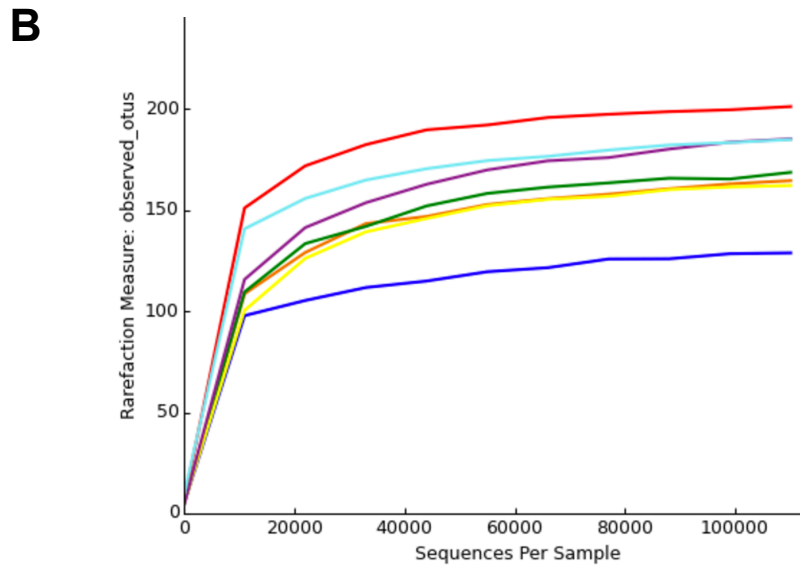

**FIG S1 (A)** Sequence information from NGS processing (Plants). **(B)** Rarefaction curves.

**FIG S2**

**A**

| Amplicon ITS                                                        | Assay A        |                 | Assay B         |                 | Assay C         |                 | M0              |
|---------------------------------------------------------------------|----------------|-----------------|-----------------|-----------------|-----------------|-----------------|-----------------|
|                                                                     | A1             | A2              | B1              | B2              | C1              | C2              | M0              |
| No. reads (2x300)                                                   | 201288         | 161241          | 142778          | 14229           | 196958          | 18471           | 188725          |
| No. sequences after pairing and quality filtering                   | 182927         | 143950          | 128244          | 142294          | 177575          | 166028          | 153966          |
| No. sequences assigned                                              | 181442         | 142822          | 127249          | 128028          | 176150          | 164708          | 153281          |
| No. sequences after additional filtering (plant sequences removed)  | 157668         | 119497          | 80396           | 88239           | 122290          | 116277          | 142618          |
| No. sequences after minimal OTUs filtering ( $n \geq 5$ )           | 156903         | 119063          | 79819           | 87655           | 121273          | 115586          | 142376          |
| No. sequences unassigned (final data for grouped analyses)          | 5941<br>(3.8%) | 5897<br>(4.95%) | 4982<br>(6.24%) | 5328<br>(6.08%) | 6079<br>(5.01%) | 5590<br>(4.83%) | 5858<br>(4.11%) |
| No. of OTUs (final data for grouped analyses)                       | 1916           | 1270            | 1693            | 1731            | 2033            | 1788            | 924             |
| No. of OTUs after filtering each pair for statistics ( $n \geq 5$ ) | 1258           | 942             | 1367            | 1396            | 1286            | 1169            | 673             |
| No. sequences for rarefaction (PCoA and statistics)                 |                |                 |                 | 79000           |                 |                 |                 |

**B**

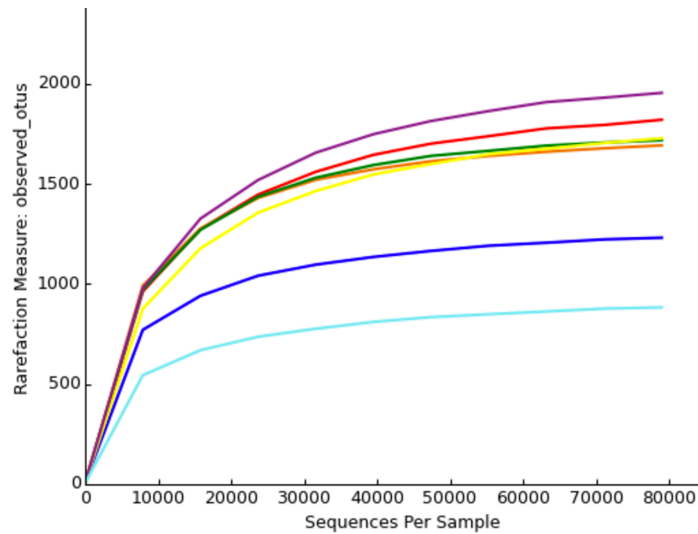

**FIG S2 (A)** Sequence information from NGS processing (Fungi). **(B)** Rarefaction curves.

**FIG S3**

**A**

| Amplicon 16S                                                                              | Assay A         |                | Assay B        |                | Assay C        |                | M0             |
|-------------------------------------------------------------------------------------------|-----------------|----------------|----------------|----------------|----------------|----------------|----------------|
|                                                                                           | A1              | A2             | B1             | B2             | C1             | C2             | M0             |
| No. reads (2x300)                                                                         | 130996          | 105725         | 136187         | 150081         | 125804         | 143440         | 177074         |
| No. sequences after pairing and quality filtering                                         | 116418          | 92797          | 122076         | 132508         | 113244         | 128593         | 162756         |
| No. sequences assigned                                                                    | 109404          | 87977          | 115222         | 124764         | 106753         | 121112         | 154014         |
| No. sequences after additional filtering (chloroplast and mitochondria sequences removed) | 94847           | 72482          | 84663          | 92914          | 71820          | 80844          | 153221         |
| No. sequences after minimal OTUs filtering ( $n \geq 5$ )                                 | 91881           | 71079          | 81771          | 90044          | 68012          | 74662          | 133091         |
| No. sequences unassigned (final data for grouped analyses)                                | 421<br>(0.45%)  | 365<br>(0.51%) | 478<br>(0.57%) | 577<br>(0.63%) | 509<br>(0.73%) | 515<br>(0.65%) | 378<br>(0.28%) |
| No. of OTUs (final data for grouped analyses)                                             | 3088            | 2013           | 3021           | 3223           | 3210           | 2932           | 2481           |
| No. of OTUs after filtering each pair for statistics ( $n \geq 5$ )                       | 2334            | 1747           | 2332           | 2297           | 2498           | 2373           | 1940           |
| No. sequences for rarefaction (PCoA and statistics)                                       | 68000 sequences |                |                |                |                |                |                |

**B**

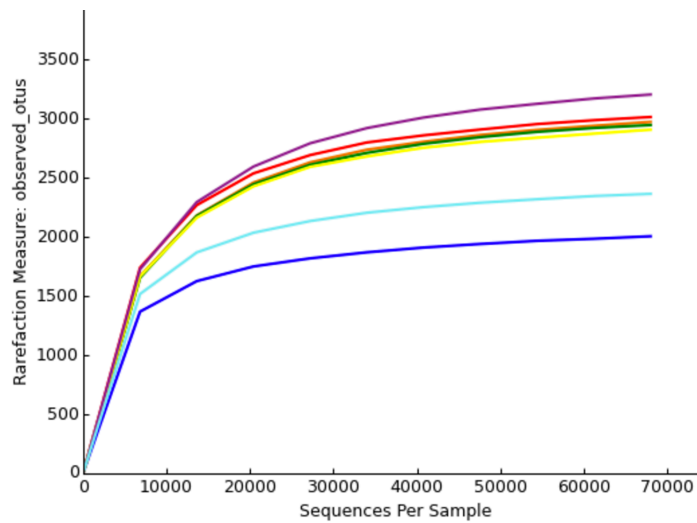

**FIG S3 (A)** Sequence information from NGS processing (Bacteria). **(B)** Rarefaction curves.

FIG S4

A

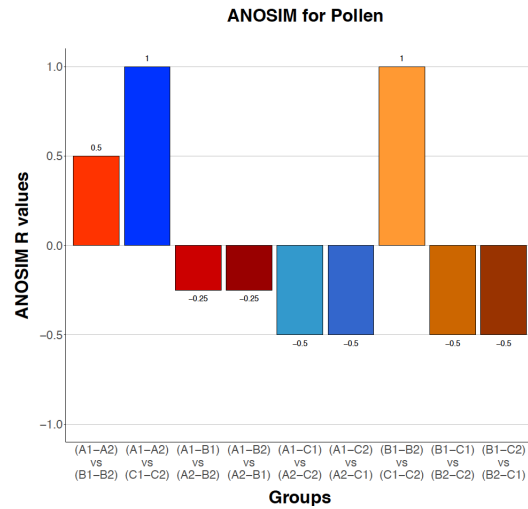

B

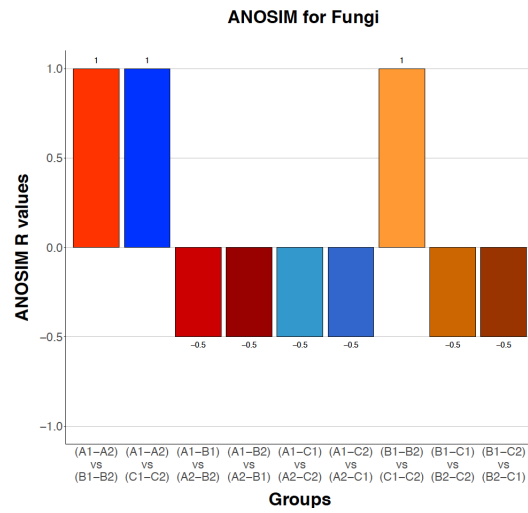

C

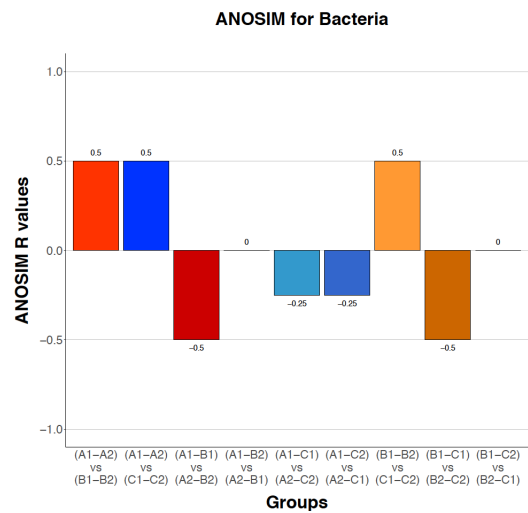

FIG S4.- ANOSIM R values determined for different group combinations between replicates for pollen (A), fungi (B), and bacteria (C).
